# Supplementary material for: Brain Responses during Anticipation and Consumption of Palatable Food in Women with and without Bulimia Nervosa or Binge Eating Disorder: disorder-related changes and modulation by intranasal oxytocin
Source: Research Square preprint supplement (doi:10.21203/rs.3.rs-6207163/v1), 2025-05-07
Supplement: Supplementary file 1 [file ce212e6cd9c6d75a820179ee.docx]

**Supplementary Material**

**Participant Eligibility Criteria**

Participants were required to be female, between 18 and 40 years old, proficient in English, and right-handed. Exclusion criteria included pregnancy, severe comorbidity (e.g., substance abuse, drug addiction, psychosis, diabetes), history of drug dependence, history of a neurological condition (e.g., epilepsy), a significant visual impairment, which is not corrected by eyewear, currently suffering from a cold or flu, currently smoking > 5 cigarettes per day (past 6 months), consuming > 21 units of alcohol per week, contraindication to MRI scans, and current intake of medication that might potentially interact with oxytocin (e.g., Prostaglandins).

**Participant Clinical Profile**

Participants with bulimia nervosa and binge eating disorder reported an average binge eating frequency of 14.14 episodes over the past 28 days (*SD* = 9.88). The women with bulimia nervosa endorsed an average frequency of self-induced vomiting equal to 10.40 occasions over the past 28 days (*SD* = 13.61), an average laxative abuse frequency of 5.13 occasions over the past 28 days (*SD* = 8.35), an average frequency of “hard exercise intended to control weight or shape” equal to 7.31 occasions over the past 28 days (*SD* = 8.57), and one participant reported using diuretic pills on 4 occasions over the past 28 days.

Of the 25 women with bulimia nervosa and binge eating disorder, 7 women had at least one comorbid psychiatric disorder. Specifically, 5 women had comorbid depression, 4 women had comorbid generalised anxiety disorder, 4 women had borderline personality disorder, 1 woman had social anxiety, 1 woman had obsessive-compulsive disorder, and 1 woman had an autism spectrum disorder. At the time of the study, 7 women were taking an antidepressant, 1 woman was taking a mood stabiliser, and one woman was taking an antipsychotic drug. Seven women were tested during the follicular phase, eight during the luteal phase and eight were on oral hormonal contraception. Two women had missing data on menstrual cycle data. Of the 27 healthy women, seven were tested during the follicular phase, two under the luteal phase and 11 were on contraception. Seven women had missing data.

**Supplementary Table S1. Effects of stimuli, diagnosis, treatment and respective interactions on pleasantness, intensity, and anxiety ratings of taste stimuli** **(sensitivity analysis accounting for age, BMI, phase of menstrual cycle, current medication and comorbidities as covariates of non-interest)**

|  | Hedonic | | | Intensity | | | Anxiety | | |
| --- | --- | --- | --- | --- | --- | --- | --- | --- | --- |
| **Statistics** | **F(1, 197)** | **p** | **BF01** | **F1,198)** | **p** | **BF01** | **F(1,198)** | **p** | **BF01** |
| Diagnosis | 6.341 | 0.017 | 4.902 | 0.566 | 0.461 | 6.65E-01 | 11.052 | 0.002 | 10.914 |
| Treatment | 0.427 | 0.518 | 0.19 | 1.031 | 0.317 | 0.177 | 1.302 | 0.262 | 0.947 |
| Stimuli | 37.549 | <0.001 | 1.59E+13 | 8.534 | <0.001 | 8.18E+25 | 4.442 | 0.043 | 0.274 |
| Diagnosis x Treatment | 0.199 | 0.659 | 0.243 | 2.128 | 0.154 | 0.251 | 0.581 | 0.451 | 0.486 |
| Diagnosis x Stimuli | 0.044 | 0.835 | 0.247 | 2.149 | 0.152 | 1.286 | 0.043 | 0.837 | 0.237 |
| Stimuli x Treatment | 0.006 | 0.94 | 0.216 | 0.064 | 0.801 | 0.247 | 0.299 | 0.588 | 0.216 |
| Diagnosis x Treatment x Stimuli | 1.742 | 0.196 | 0.485 | 0.019 | 0.890 | 0.239 | 0.0499 | 0.85 | 0.246 |

**Supplementary Table S2. Changes in the BOLD signal associated with the anticipation of palatable taste as compared to water in the placebo session.** All significant clusters surviving pFWE<0.05.

| Contrast | Index | Hemisphere | Size | Value | x | y | z | Regions |
| --- | --- | --- | --- | --- | --- | --- | --- | --- |
| Cue Chocolate > Cue Water | 1 | Left | 53 | 5.47 | -56 | -8 | 30 | Precentral / Postcentral gyrus |
| Cue Chocolate < Cue Water | 1 | Bilateral | 416 | 5.45 | 0 | -32 | 66 | Precentral gyrus |
| 5.11 | 0 | -22 | 64 | Precentral gyrus |
| 4.58 | 0 | -16 | 58 | Precentral/Supplementary motor cortex |
| 2 | Bilateral | 5512 | 8.53 | -14 | -94 | -6 | Occipital pole |
| 7.95 | -40 | -78 | -10 | Lateral Occipital Cortex |
| 7.72 | -22 | -86 | -14 | Fusiform gyrus |

**Supplementary Table S3.** **Changes in the BOLD signal associated with the receipt of palatable taste as compared to water in the placebo session.** All significant clusters surviving pFWE<0.05.

| Contrast | Index | Hemisphere | Size | Value | x | y | z | Regions |
| --- | --- | --- | --- | --- | --- | --- | --- | --- |
| Delivery Chocolate  > Delivery Water | 1 | Left | 11 | 5.46 | -38 | -10 | 12 | Insula |
| 2 | Right | 31 | 5.67 | 38 | -6 | 12 | Central opercular cortex |
| 3 | Right | 57 | 5.45 | 8 | -70 | -48 | Cerebellum |
| 4 | Left | 103 | 5.77 | -12 | -70 | -48 | Cerebellum (VIII) |
| 5 | Right | 249 | 6.08 | 18 | -62 | -22 | Cerebellum (VI) |
| 6 | Left | 264 | 4.89 | -36 | -76 | -42 | Crus II |
| 3.87 | -24 | -82 | -42 |
| 3.42 | -24 | -82 | -48 |
| 7 | Left | 757 | 7.41 | -56 | -8 | 28 | Precentral / Postcentral gyrus |
| 6.50 | -56 | -10 | 44 |
| 4.74 | -64 | -64 | 22 |
| 8 | Right | 979 | 8.09 | 60 | -4 | 24 | Precentral / Postcentral gyrus |
| 6.96 | 60 | -6 | 40 |
| 6.48 | 58 | -8 | 44 |
| 9 | Left | 1500 | 5.48 | -18 | -64 | -20 | Cerebellum (VI) |
| 4.14 | 2 | -78 | 2 |
| 3.98 | -12 | -66 | -6 |

**Supplementary Table S4. Effects of diagnosis, treatment and diagnosis x treatment on BOLD responses during anticipation of palatable as compared to tasteless stimuli (sensitivity analysis accounting for age, BMI, phase of menstrual cycle, current medication and comorbidities as covariates of non-interest)**

| Region | Main effect diagnosis | | | | Main effect treatment | | | | Interaction diagnosis x treatment | | | |
| --- | --- | --- | --- | --- | --- | --- | --- | --- | --- | --- | --- | --- |
| **F(1,103)** | **p** | **pFDR** | **BF01** | **F(1,103)** | **p** | **pFDR** | **BF01** | **F(1,103)** | **p** | **pFDR** | **BF01** |
| Nucleus Accumbens | 0.346 | 0.560 | 0.840 | 0.233 | 0.707 | 0.402 | 0.804 | 0.277 | 1.277 | 0.266 | 0.660 | 0.363 |
| Midbrain | 0.442 | 0.511 | 0.840 | 0.183 | 0.993 | 0.326 | 0.804 | 0.149 | 0.043 | 0.836 | 0.836 | 0.007 |
| Caudate | 0.621 | 0.436 | 0.840 | 0.167 | 0.054 | 0.817 | 0.817 | 0.167 | 0.542 | 0.466 | 0.669 | 0.063 |
| Putamen | 0.735 | 0.397 | 0.840 | 0.143 | 0.074 | 0.787 | 0.817 | 0.209 | 0.975 | 0.330 | 0.660 | 0.069 |
| Pallidum | 0.021 | 0.884 | 0.908 | 0.288 | 0.289 | 0.594 | 0.817 | 0.228 | 2.422 | 0.129 | 0.660 | 0.334 |
| Amygdala | 0.013 | 0.908 | 0.908 | 0.172 | 2.330 | 0.136 | 0.804 | 0.199 | 0.189 | 0.672 | 0.806 | 0.044 |

**Supplementary Table S5. Effects of diagnosis, treatment and diagnosis x treatment on BOLD responses during delivery of palatable as compared to tasteless stimuli (sensitivity analysis accounting for age, BMI, phase of menstrual cycle, current medication and comorbidities as covariates of non-interest)**

| Region | Main effect diagnosis | | | | Main effect treatment | | | | Interaction diagnosis x treatment | | | |
| --- | --- | --- | --- | --- | --- | --- | --- | --- | --- | --- | --- | --- |
| **F(1,98)** | **p** | **pFDR** | **BF01** | **F(1,98)** | **p** | **pFDR** | **BF01** | **F(1,98)** | **p** | **pFDR** | **BF01** |
| Nucleus Accumbens | 0.068 | 0.796 | 0.928 | 0.178 | 0.247 | 0.661 | 0.856 | 0.113 | 0.281 | 0.442 | 0.858 | 0.147 |
| Midbrain | 1.240 | 0.271 | 0.874 | 0.269 | 0.035 | 0.856 | 0.856 | 0.155 | 0.459 | 0.502 | 0.858 | 0.063 |
| Caudate | 0.387 | 0.537 | 0.928 | 0.211 | 0.100 | 0.753 | 0.856 | 0.156 | 0.391 | 0.535 | 0.858 | 0.058 |
| Putamen | 0.180 | 0.629 | 0.928 | 0.189 | 0.175 | 0.678 | 0.856 | 0.158 | 0.059 | 0.808 | 0.858 | 0.042 |
| Pallidum | 0.008 | 0.928 | 0.928 | 0.178 | 0.114 | 0.737 | 0.856 | 0.157 | 0.100 | 0.753 | 0.858 | 0.046 |
| Insula | 22.603 | 0.001 | 0.008 | 330.223 | 0.054 | 0.817 | 0.856 | 0.176 | 0.032 | 0.858 | 0.858 | 0.191 |
| Hypothalamus | 0.015 | 0.911 | 0.928 | 0.222 | 3.474 | 0.032 | 0.256 | 32.294 | 0.111 | 0.564 | 0.858 | 0.327 |
| Amygdala | 0.975 | 0.328 | 0.875 | 0.251 | 1.155 | 0.281 | 0.856 | 0.270 | 0.049 | 0.825 | 0.858 | 0.082 |

**Supplementary Table S6. Correlations between changes in the BOLD signal associated with the receipt of palatable stimuli (as compared to water) in the insula and behavioural ratings of taste stimuli.**

|  |  |  | BN/BED | HC |
| --- | --- | --- | --- | --- |
| Chocolate milk | **Hedonic** | Pearson’s r | 0.121 | 0.023 |
| p | 0.556 | 0.910 |
| BF01 | 0.287 | 0.245 |
| **Intensity** | Pearson’s r | 0.009 | 0.233 |
| p | 0.967 | 0.251 |
| BF01 | 0.244 | 0.455 |
| **Anxiety** | Pearson’s r | -0.218 | 0.097 |
| p | 0.284 | 0.637 |
| BF01 | 0.420 | 0.271 |
| Water | **Hedonic** | Pearson’s r | -0.236 | -0.132 |
| p | 0.246 | 0.519 |
| BF01 | 0.461 | 0.296 |
| **Intensity** | Pearson’s r | -0.097 | -0.157 |
| p | 0.645 | 0.453 |
| BF01 | 0.274 | 0.324 |
| **Anxiety** | Pearson’s r | -0.231 | 0.099 |
| p | 0.256 | 0.629 |
| BF01 | 0.449 | 0.272 |

**Supplementary Table S7**. **Correlations between changes in the BOLD signal associated with the receipt of palatable stimuli (as compared to water) in the insula and clinical symptoms.**

|  |  | BN/BED | HC |
| --- | --- | --- | --- |
| BMI | Pearson’s r | 0.237 | -0.073 |
| p | 0.255 | 0.753 |
| BF01 | 0.459 | 0.283 |
| EDEQ | Pearson’s r | -0.180 | 0.333 |
| p | 0.389 | 0.163 |
| BF01 | 0.353 | 0.702 |
| Depression, anxiety, and stress (PCA) | Pearson’s r | -0.163 | 0.169 |
| p | 0.447 | 0.453 |
| BF01 | 0.333 | 0.344 |
